# Supplementary material for: Use of hospital services by age and comorbidity after an index heart failure admission in England: an observational study
Source: PubMed Central journal article supplement (PMC4908910; doi:10.1136/bmjopen-2015-010669), 2016-06-09
Supplement: bmjopen-2015-010669supp_table.pdf [file bmjopen-2015-010669supp_table.pdf]

Supplementary Table A1. List and descriptions of patient factors used in risk-adjustment regression models

| Factor                                                                                       | Codes and/or description (ICD10 unless specified)                                                                     |
|----------------------------------------------------------------------------------------------|-----------------------------------------------------------------------------------------------------------------------|
| Age                                                                                          | Categorised at 18-44 then five-year bands from 45-49 to 85-89, then 90+                                               |
| Sex                                                                                          |                                                                                                                       |
| Carstairs deprivation fifth                                                                  | Measure of socio-economic status of small geographical area of residence                                              |
| CABG in year before or during index HF admission                                             | OPCS codes K40, K41, K42, K43, K44, K45, K46                                                                          |
| PTCA in year before or during index HF admission                                             | OPCS codes K49, K50, K75                                                                                              |
| Implantable cardioverter defibrillator implanted in year before or during index HF admission | OPCS codes K590, K591, K592, K593, K594, K596, K598, K599                                                             |
| Pacemaker (not CRT) inserted in year before or during index HF admission                     | OPCS codes K600, K601, K602, K603, K605, K606, K607, K608, K609, K610, K611, K612, K613, K615, K616, K617, K618, K619 |
| CRT inserted in year before or during index HF admission                                     | OPCS codes K607, K617                                                                                                 |
| OPD appointments missed in year before index HF admission                                    |                                                                                                                       |

|                                                             |                                                                                                                 |
|-------------------------------------------------------------|-----------------------------------------------------------------------------------------------------------------|
| OPD appointments attended in year before index HF admission |                                                                                                                 |
| Comorbidity flags, all defined using ICD10 codes:           | All comorbidity flags were based on information during the index admission or in any admission in previous year |
| Stroke                                                      | I60, I61, I62, I63, I64                                                                                         |
| Pneumonia                                                   | J12, J13, J14, J15, J16, J17, J18                                                                               |
| Ischaemic heart disease                                     | I20, I21, I22, I23, I25                                                                                         |
| Dementia                                                    | F00, F01, F02, F051                                                                                             |
| Arrhythmias                                                 | I441, I442, I443, I456, I459, I47, I48, I49, R000, R001, R008, T821, Z450, Z950                                 |
| Heart valve disorders                                       | A520, I05, I06, I07, I08, I091, I098, I34, I35, I36, I37, I38, I39, Q230, Q231, Q232, Q233, Z952, Z953, Z954    |
| Peripheral vascular disease                                 | I70, I71, I731, I738, I739, I771, I790, I792, K551, K558, K559, Z958, Z959                                      |
| Hypertension                                                | I10, I11, I12, I13, I15                                                                                         |
| Chronic lung diseases                                       | I278, I279, J40, J41, J42, J43, J44, J45, J46, J47, J60, J61, J62, J63, J64, J65, J66, J67, J684, J701, J703    |
| Diabetes                                                    | E10, E11, E12, E13, E14                                                                                         |
| Renal disease                                               | I120, I131, N18, N19, N250, Z490, Z491, Z492, Z940, Z992                                                        |

|                                               |                                                        |
|-----------------------------------------------|--------------------------------------------------------|
| Obesity                                       | E66                                                    |
| Any mental health condition (except dementia) | F06, F07, F09, then rest of F chapter from F20 onwards |
| Living alone                                  | Z602                                                   |
